# Supplementary material
Source: PubMed Central journal article supplement (PMC2941397)

## Supplemental Figures

*Figure I.* Effects of HNG on cardiac AMPK phosphorylation of threonine 172 (i.e., pAMPK<sup>Thr172</sup>) following *in vivo* MI-R in mice.

*Figure II.* Effects of HNG on phosphorylation levels of serine 1177 on eNOS (i.e., phospho-eNOS<sup>Ser1177</sup>) following *in vivo* MI-R in mice.

*Supplemental Figure I*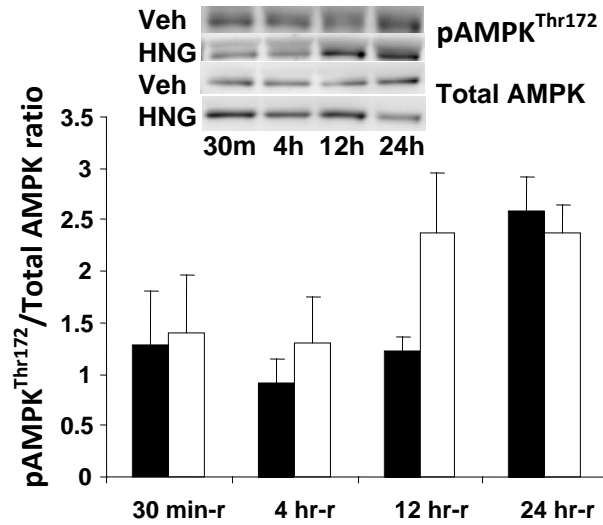*Supplemental Figure II*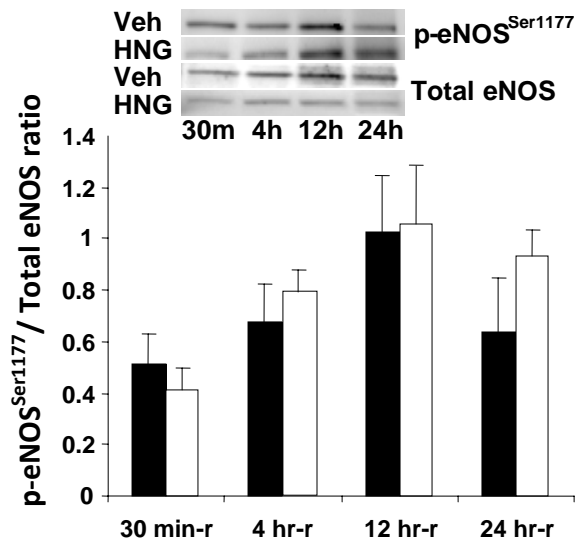

Supplement: NIHMS229227-supplement-Supp1.pdf [file NIHMS229227-supplement-Supp1.pdf]
